# Supplementary material for: Screening of the Open Source Malaria Box Reveals an Early Lead Compound for the Treatment of Alveolar Echinococcosis
Source: PLoS Negl Trop Dis. 2016 Mar 11;10(3):e0004535. doi: 10.1371/journal.pntd.0004535 (PMC4788259; doi:10.1371/journal.pntd.0004535)
Supplement: S2 Table — (XLSX) [file pntd.0004535.s002.xlsx]

## Sheet: Tabelle1
drug name	concentration (uM)	mean viability	SD
MMV665807	100	3.05638	0.892815
MMV665807	50	2.89584	0.618278
MMV665807	25	2.9189	0.826106
MMV665807	12.5	2.84284	0.222288
MMV665807	6.25	4.70532	0.236132
MMV665807	3.125	6.05544	0.393727
MMV665807	1.5625	5.29007	0.250254
MMV665807	0.78125	97.8667	2.95931
MMV665807	0.390625	68.9545	9.87752
MMV665807	0.195312	65.4473	2.45456
MMV665807	0.0976562	59.7338	6.286
Mefloquine	100	8.49081	1.36271
Mefloquine	50	5.25437	1.35839
Mefloquine	25	83.1215	3.23675
Mefloquine	12.5	79.4296	5.40006
Mefloquine	6.25	65.8301	9.76495
Mefloquine	3.125	63.483	1.98247
Mefloquine	1.5625	75.0524	9.55721
Mefloquine	0.78125	70.9248	6.48019
Mefloquine	0.390625	67.9048	20.6667
Mefloquine	0.195312	74.3393	0.964746
Mefloquine	0.0976562	59.7308	20.4261
